# Supplementary material for: Synthesis and chemical characterization of several perfluorinated sialic acid glycals and evaluation of their in vitro antiviral activity against Newcastle disease virus
Source: Royal Society of Chemistry journal article supplement (doi:10.1039/c7md00072c), 2017-01-01
Supplement: c7md00072c1.pdf [file c7md00072c1.pdf]

## Supplementary Data

### **Synthesis and chemical characterization of several perfluorinated sialic acid glycals and evaluation of their *in vitro* antiviral activity against the Newcastle Disease Virus**

**P. Rota,<sup>a,b,\*</sup> N. Papini,<sup>c</sup> P. La Rocca,<sup>a,b</sup> M. Montefiori,<sup>d</sup> F. Cirillo,<sup>a</sup> M. Piccoli,<sup>a</sup> R. Scurati,<sup>d</sup> L. Olsen,<sup>d</sup> P. Allevi<sup>b</sup> and L. Anastasia<sup>a,e</sup>**

<sup>a</sup>Laboratory of Stem Cells for Tissue Engineering, IRCCS Policlinico San Donato, piazza Malan 2, 20097 San Donato Milanese, Milan, Italy, E-mail: [paola.rota@unimi.it](mailto:paola.rota@unimi.it); <sup>b</sup>Department of Biomedical, Surgical and Dental Sciences, University of Milan, Via Saldini 50, 20133 Milan (Italy); <sup>c</sup>Department of Medical Biotechnology and Translational Medicine, University of Milan, Via Fratelli Cervi 93, 20090 Segrate (Milan, Italy); <sup>d</sup>Department of Drug Design and Pharmacology, University of Copenhagen, Universitetsparken 2, 2100 Copenhagen (Denmark); <sup>e</sup>Department of Biomedical Sciences for Health, University of Milan, Via Fratelli Cervi 9, 20090 Segrate (Milan, Italy).

| <b>Contents</b>                                                                            | <b>Page Number</b> |
|--------------------------------------------------------------------------------------------|--------------------|
| <sup>1</sup> H and <sup>13</sup> C NMR of synthesized glycals <b>2a-f</b> and <b>7a-7d</b> | S2-S17             |
| MTT assay                                                                                  | S18                |
| Docking poses compounds <b>2a-2d</b>                                                       | S19-S20            |

---

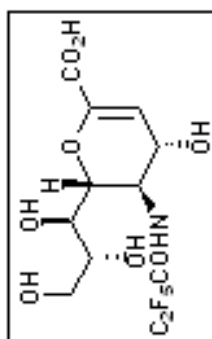

2c

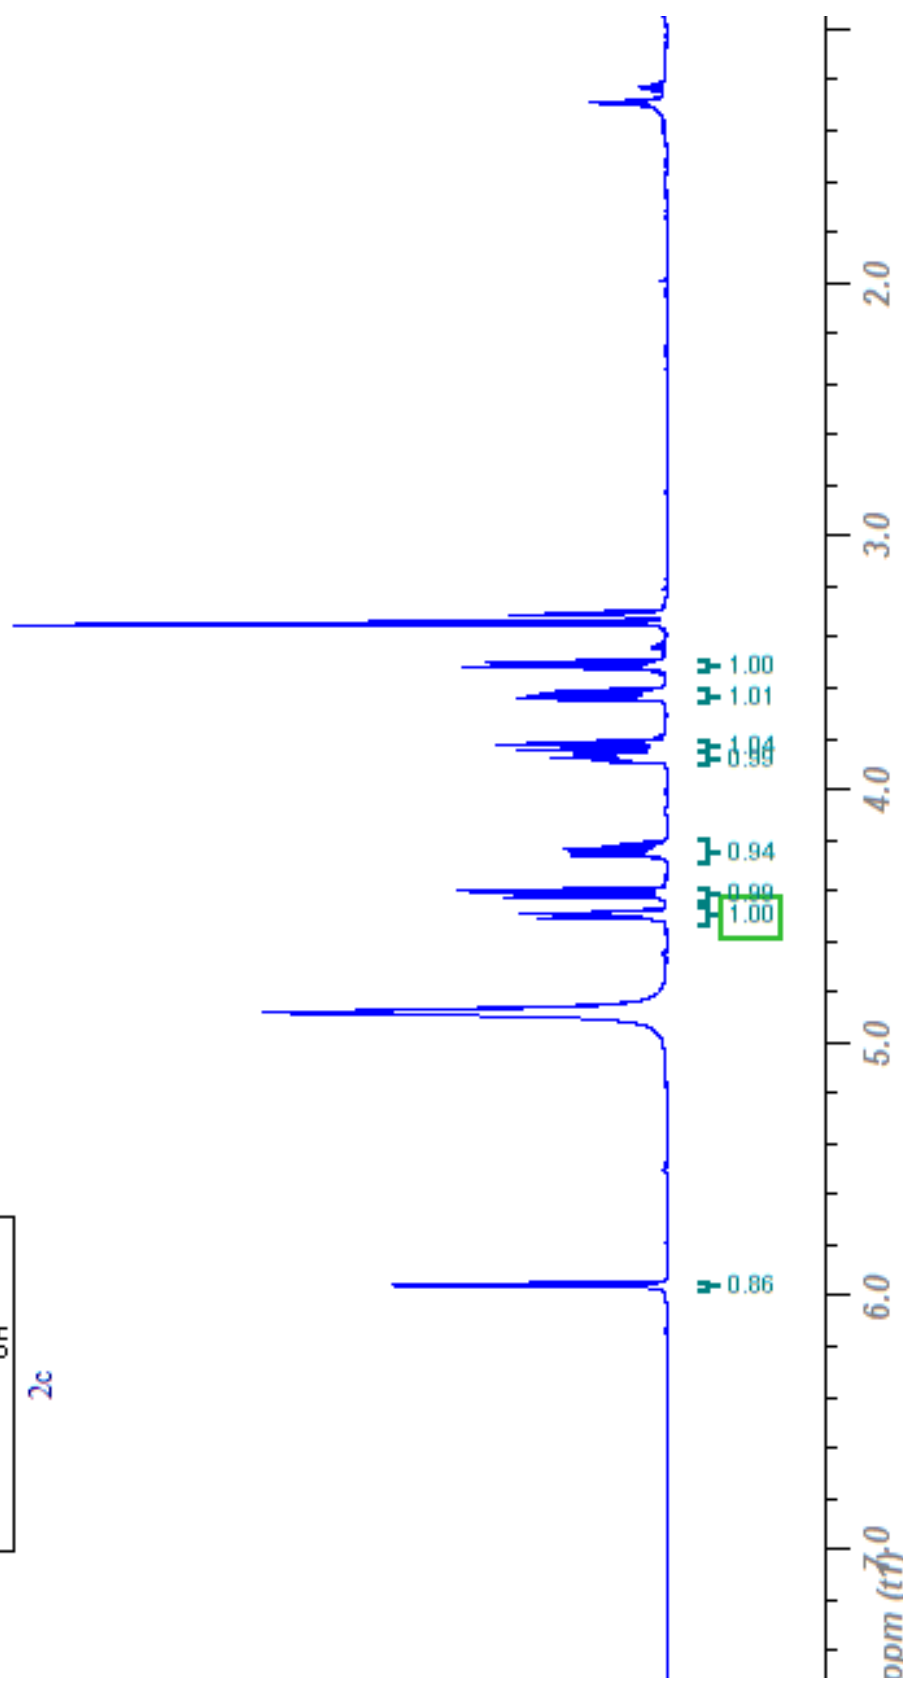

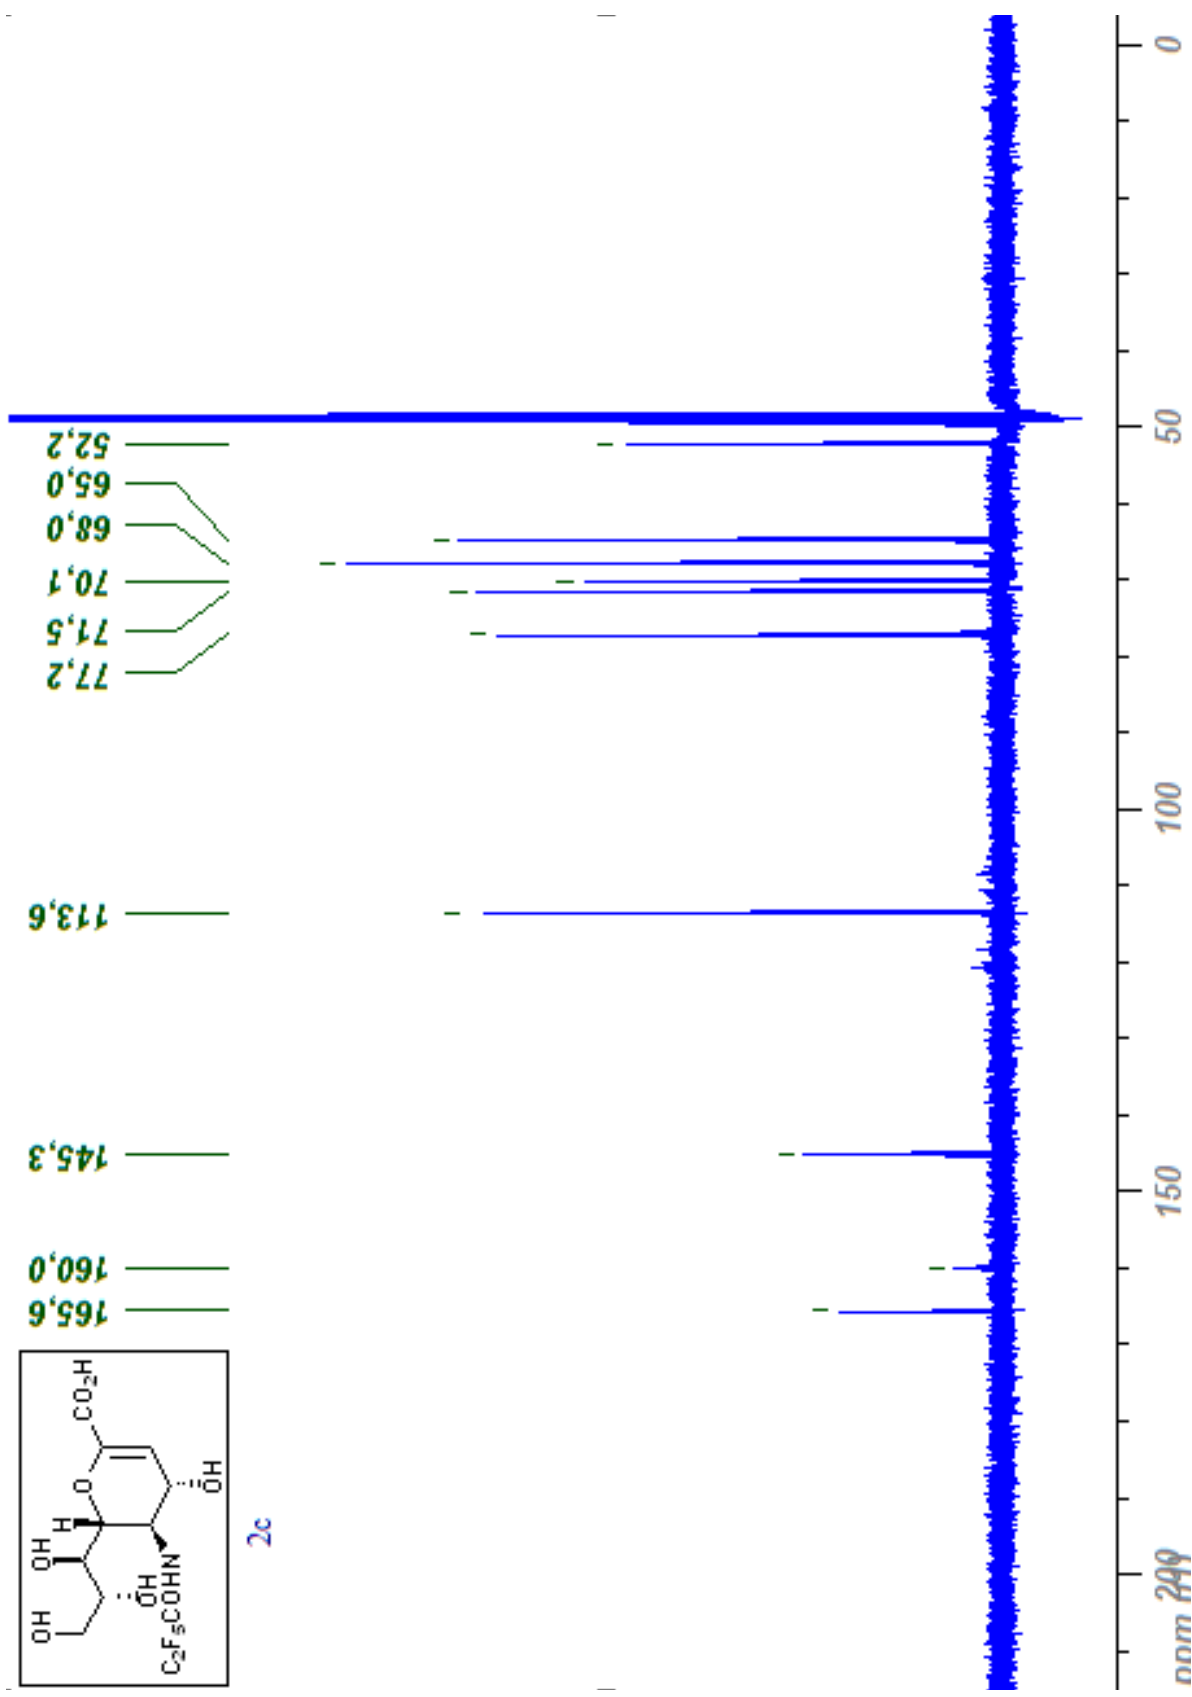

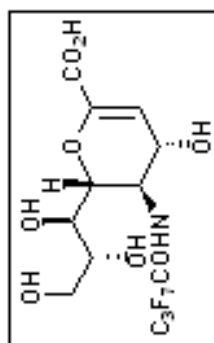

2d

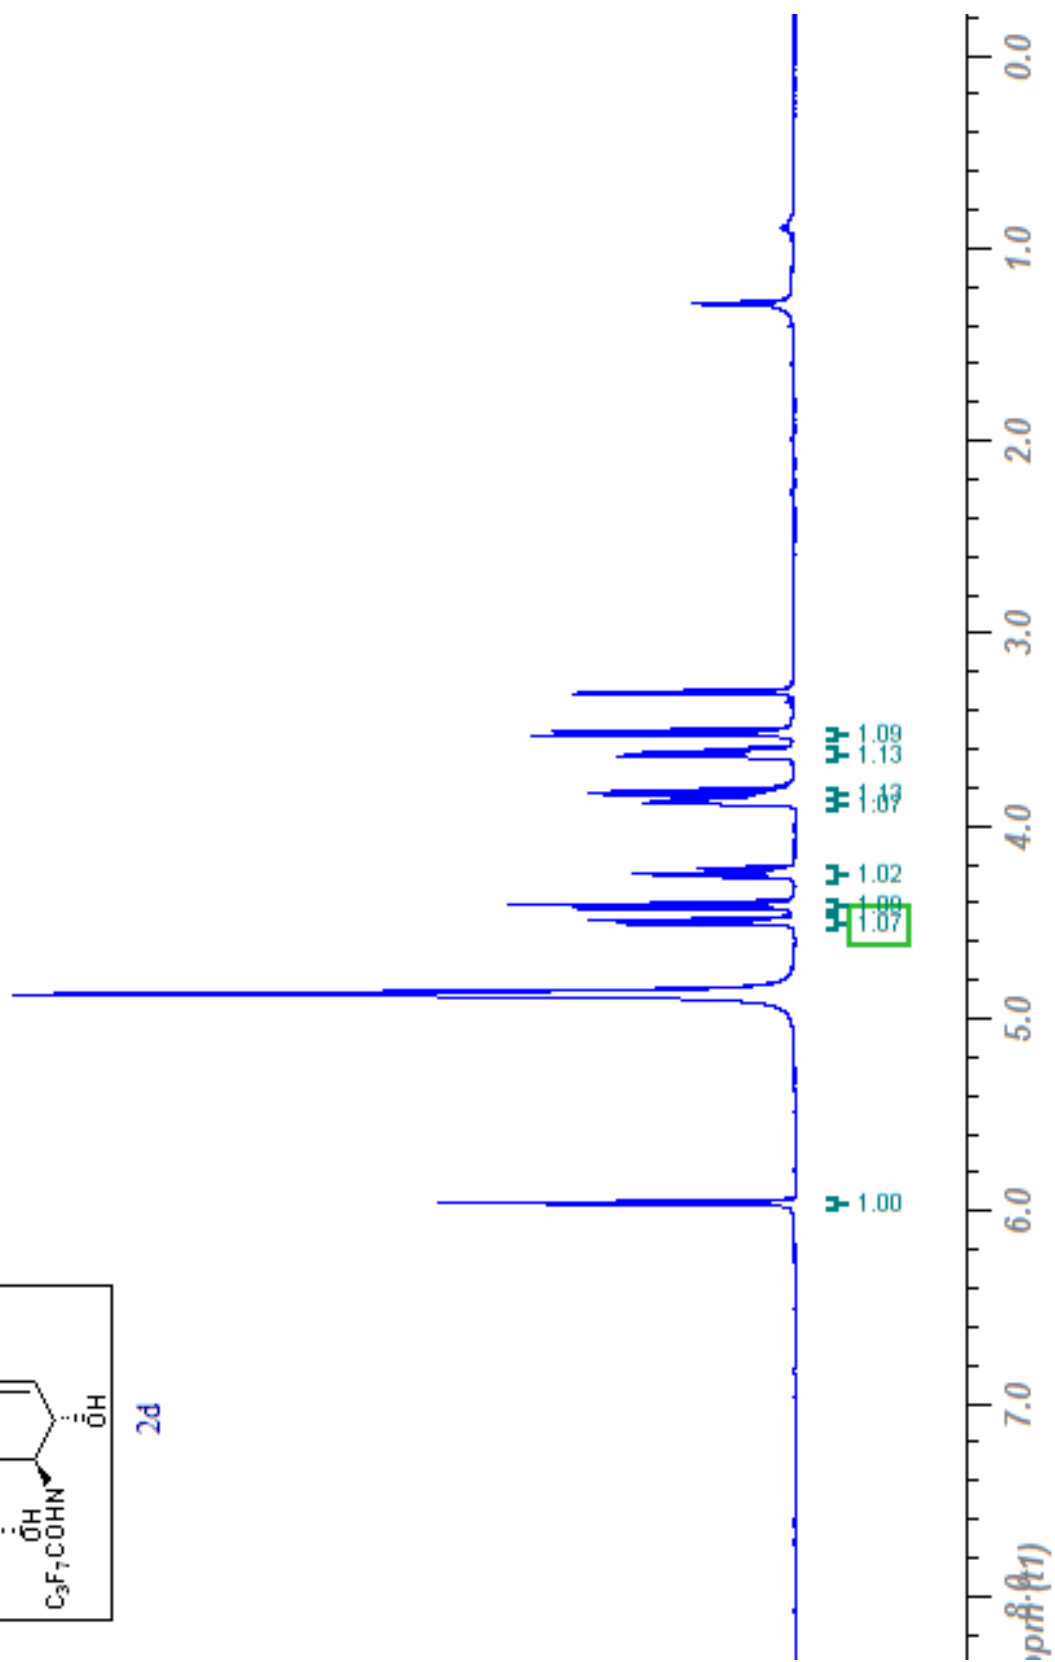

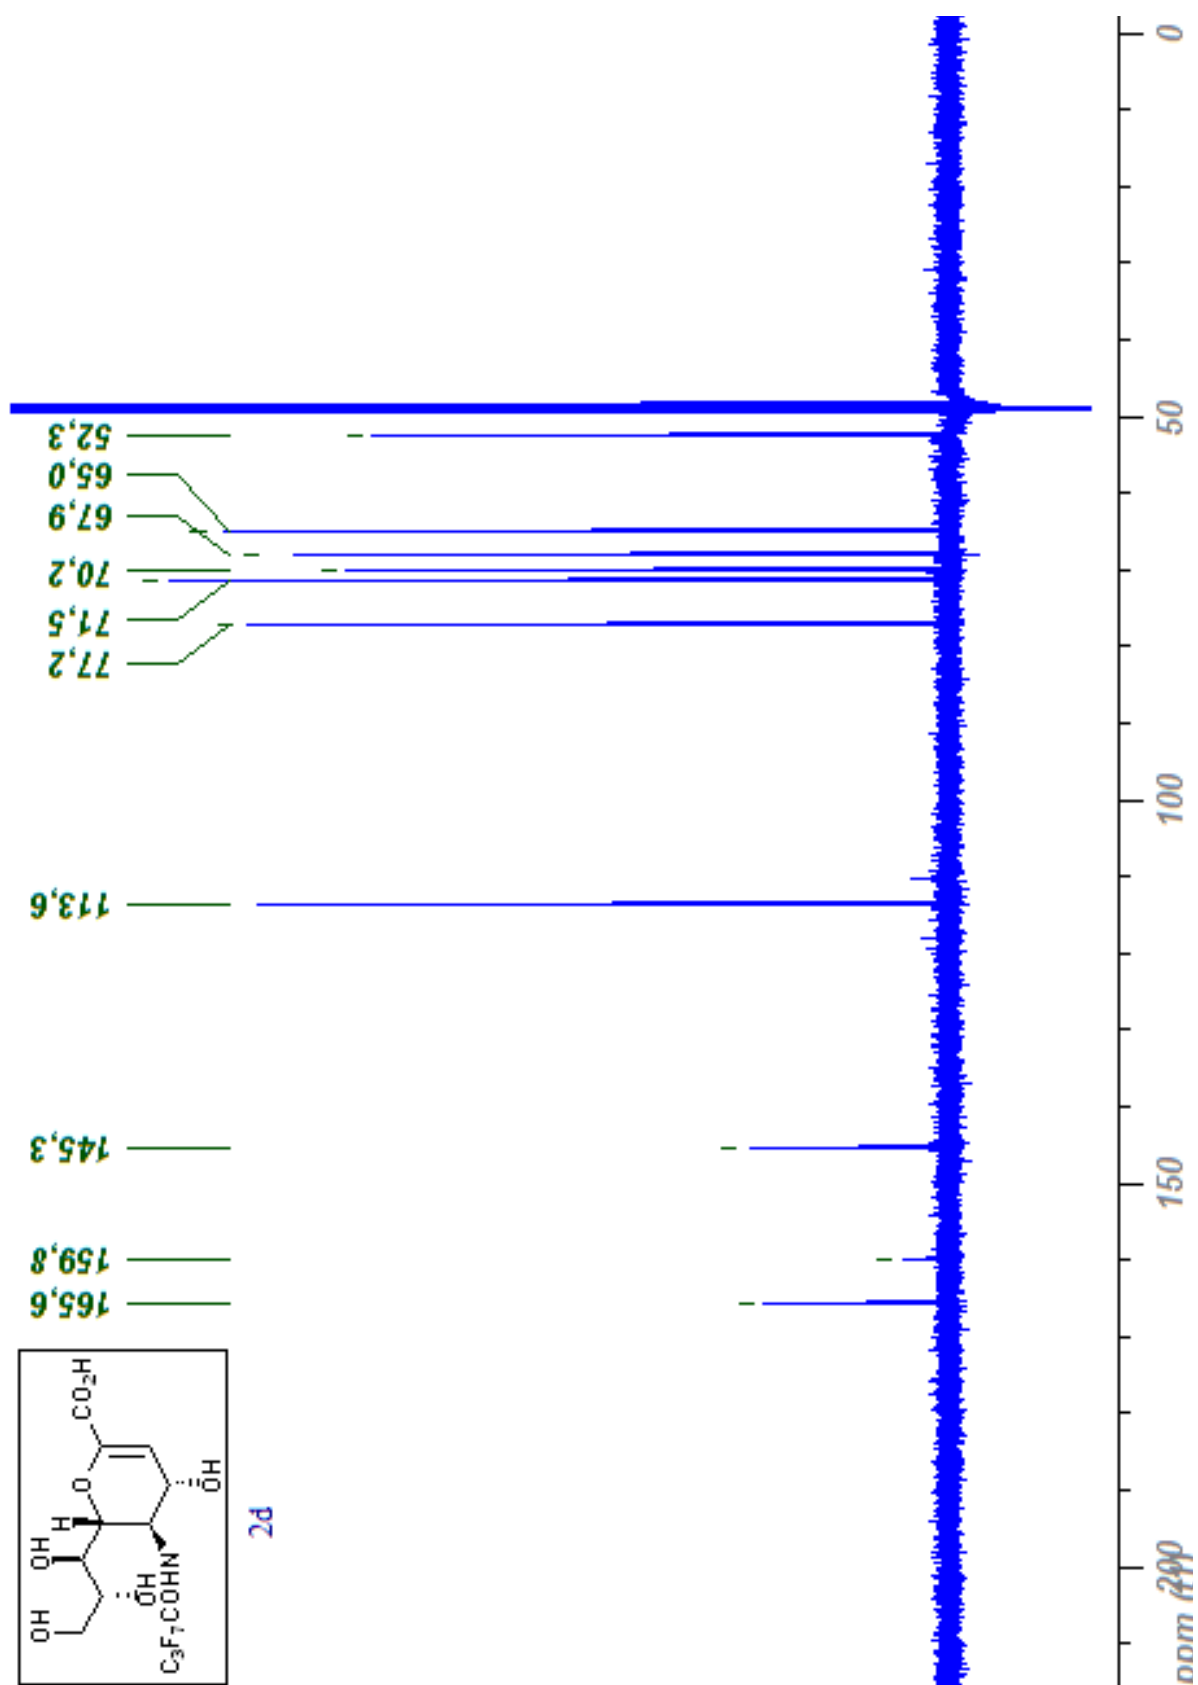

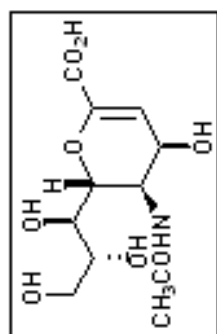

7a

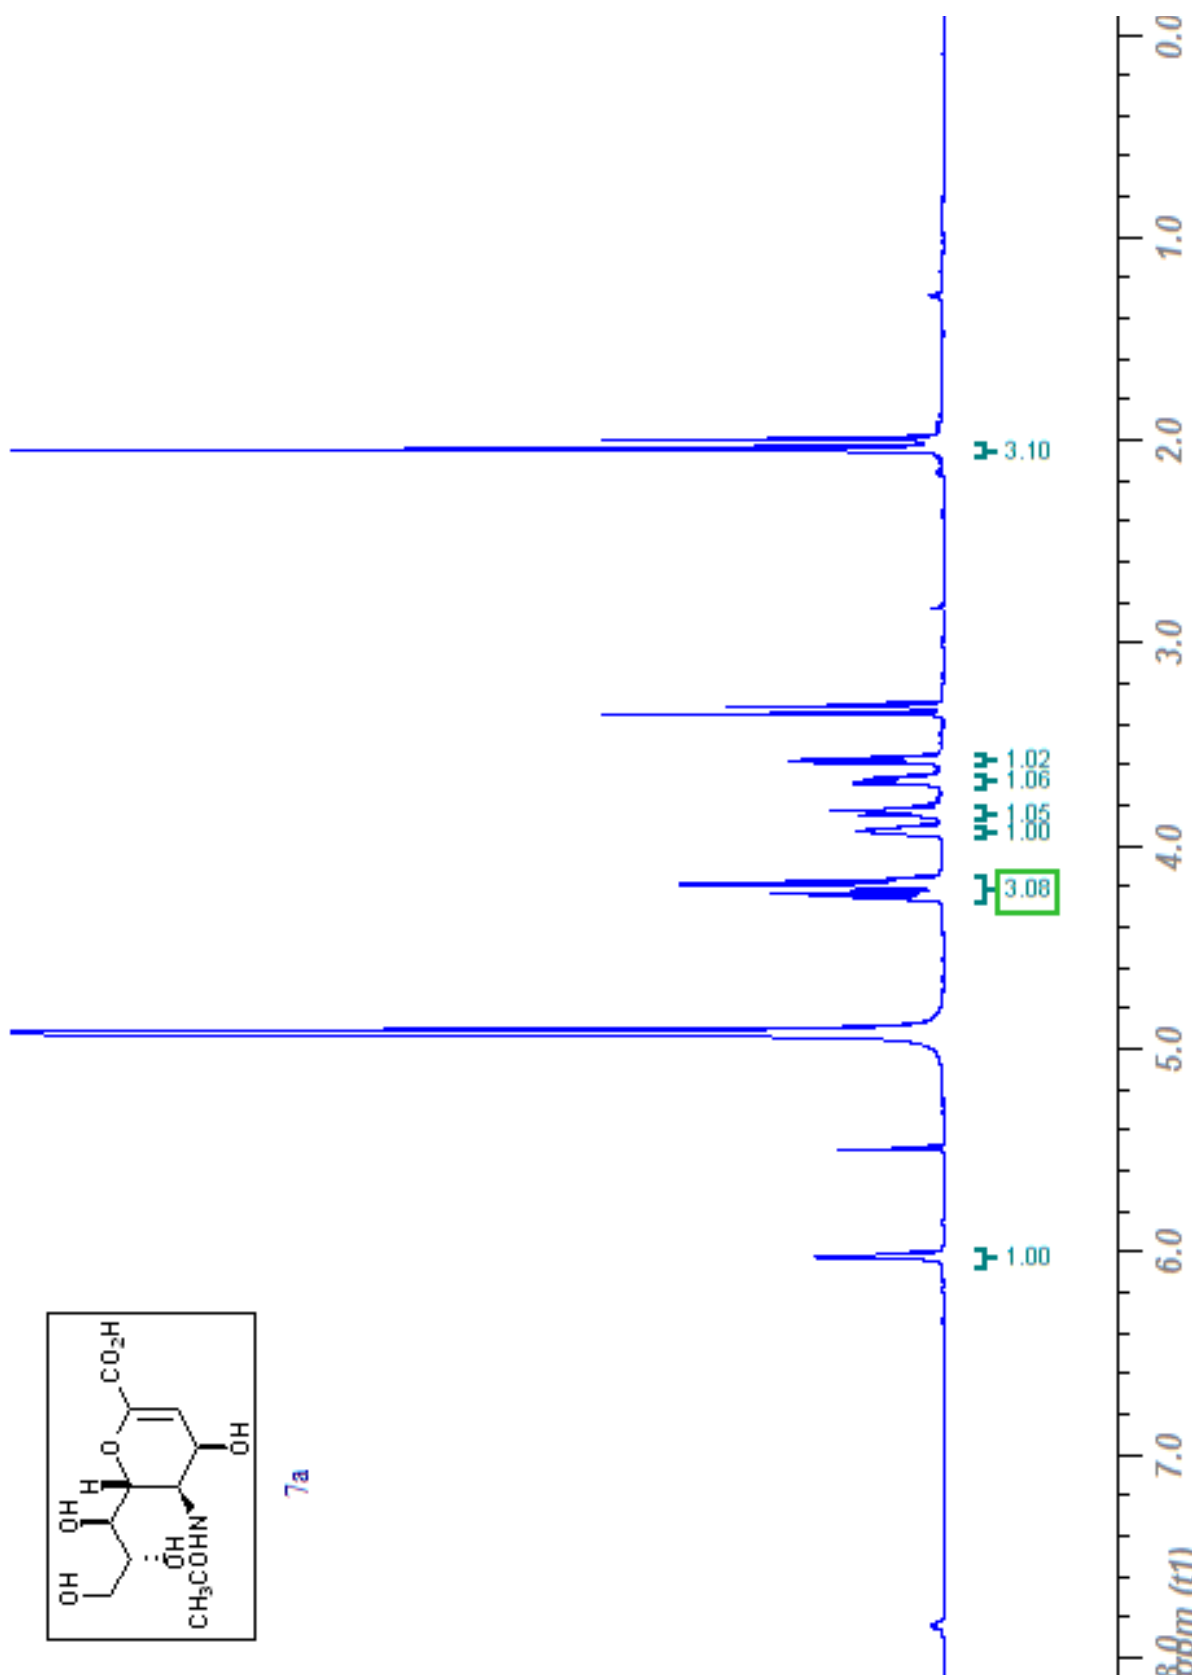

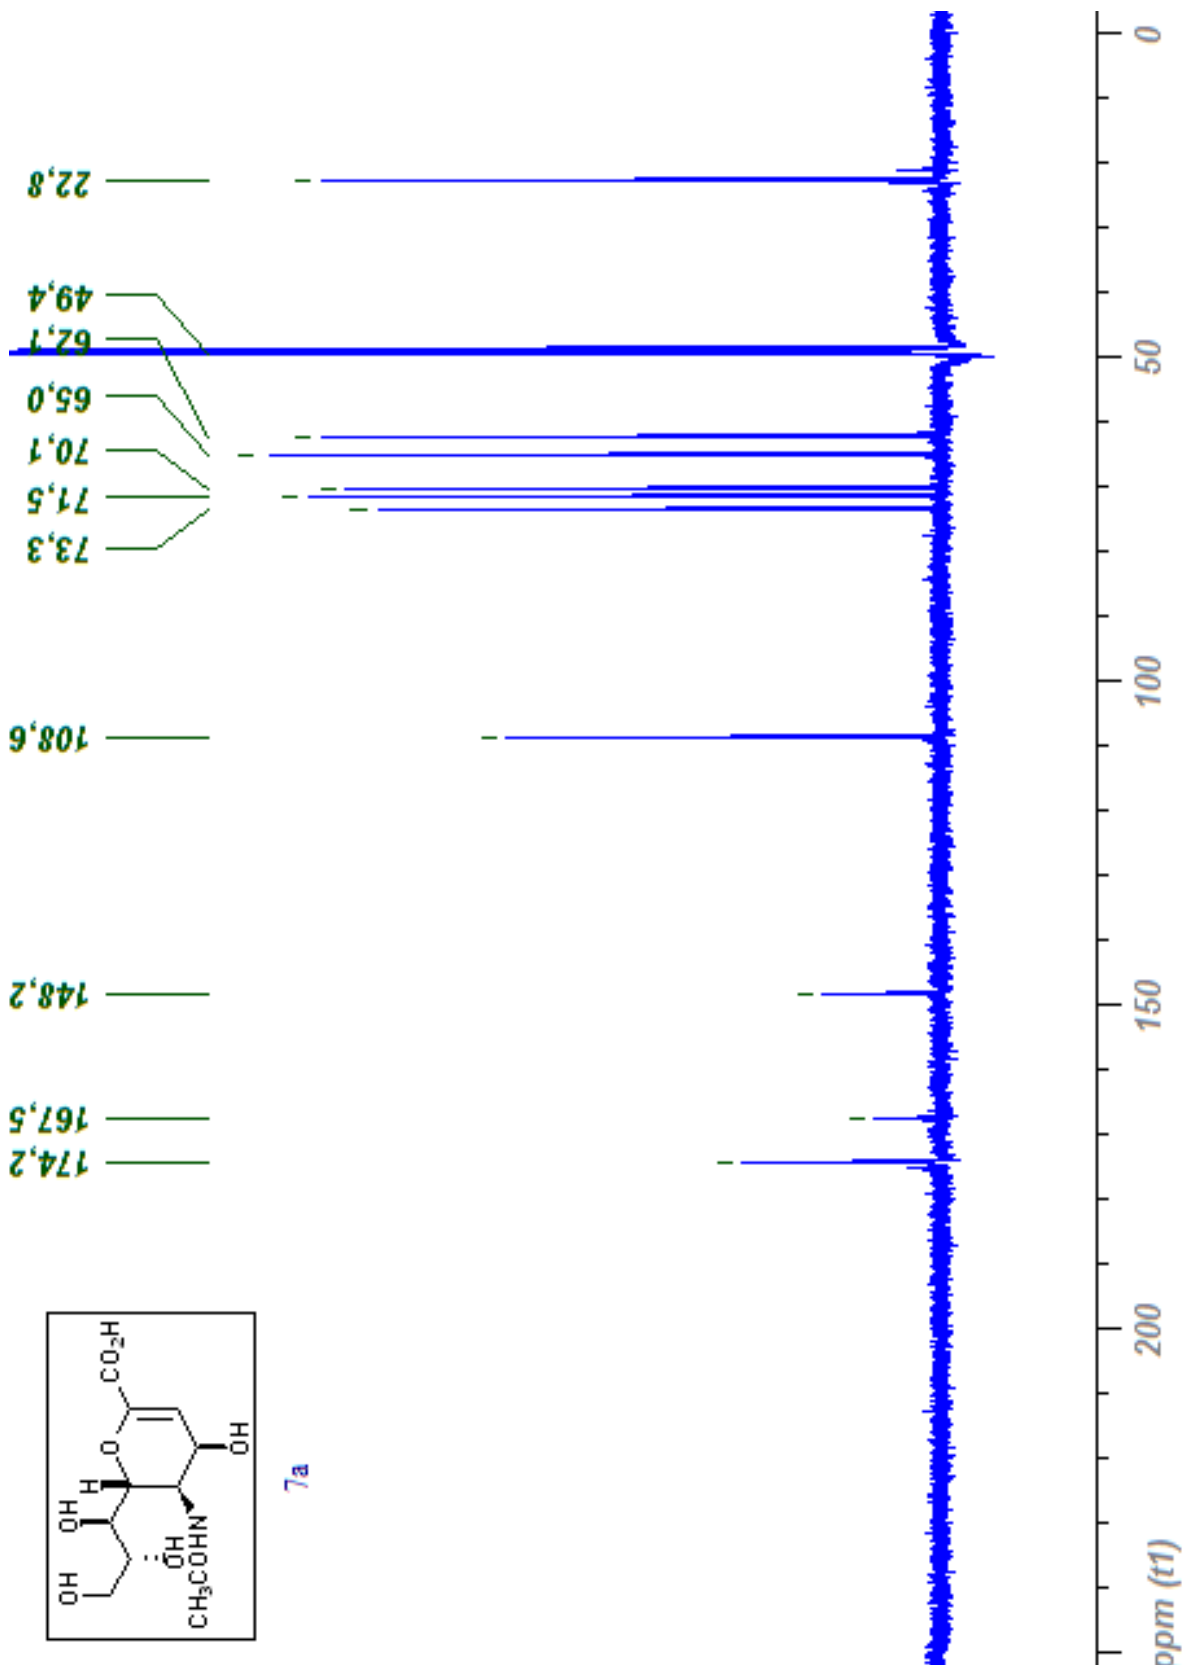

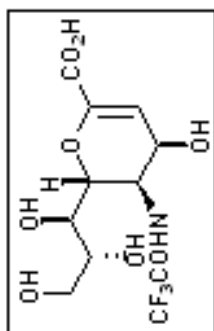

7b

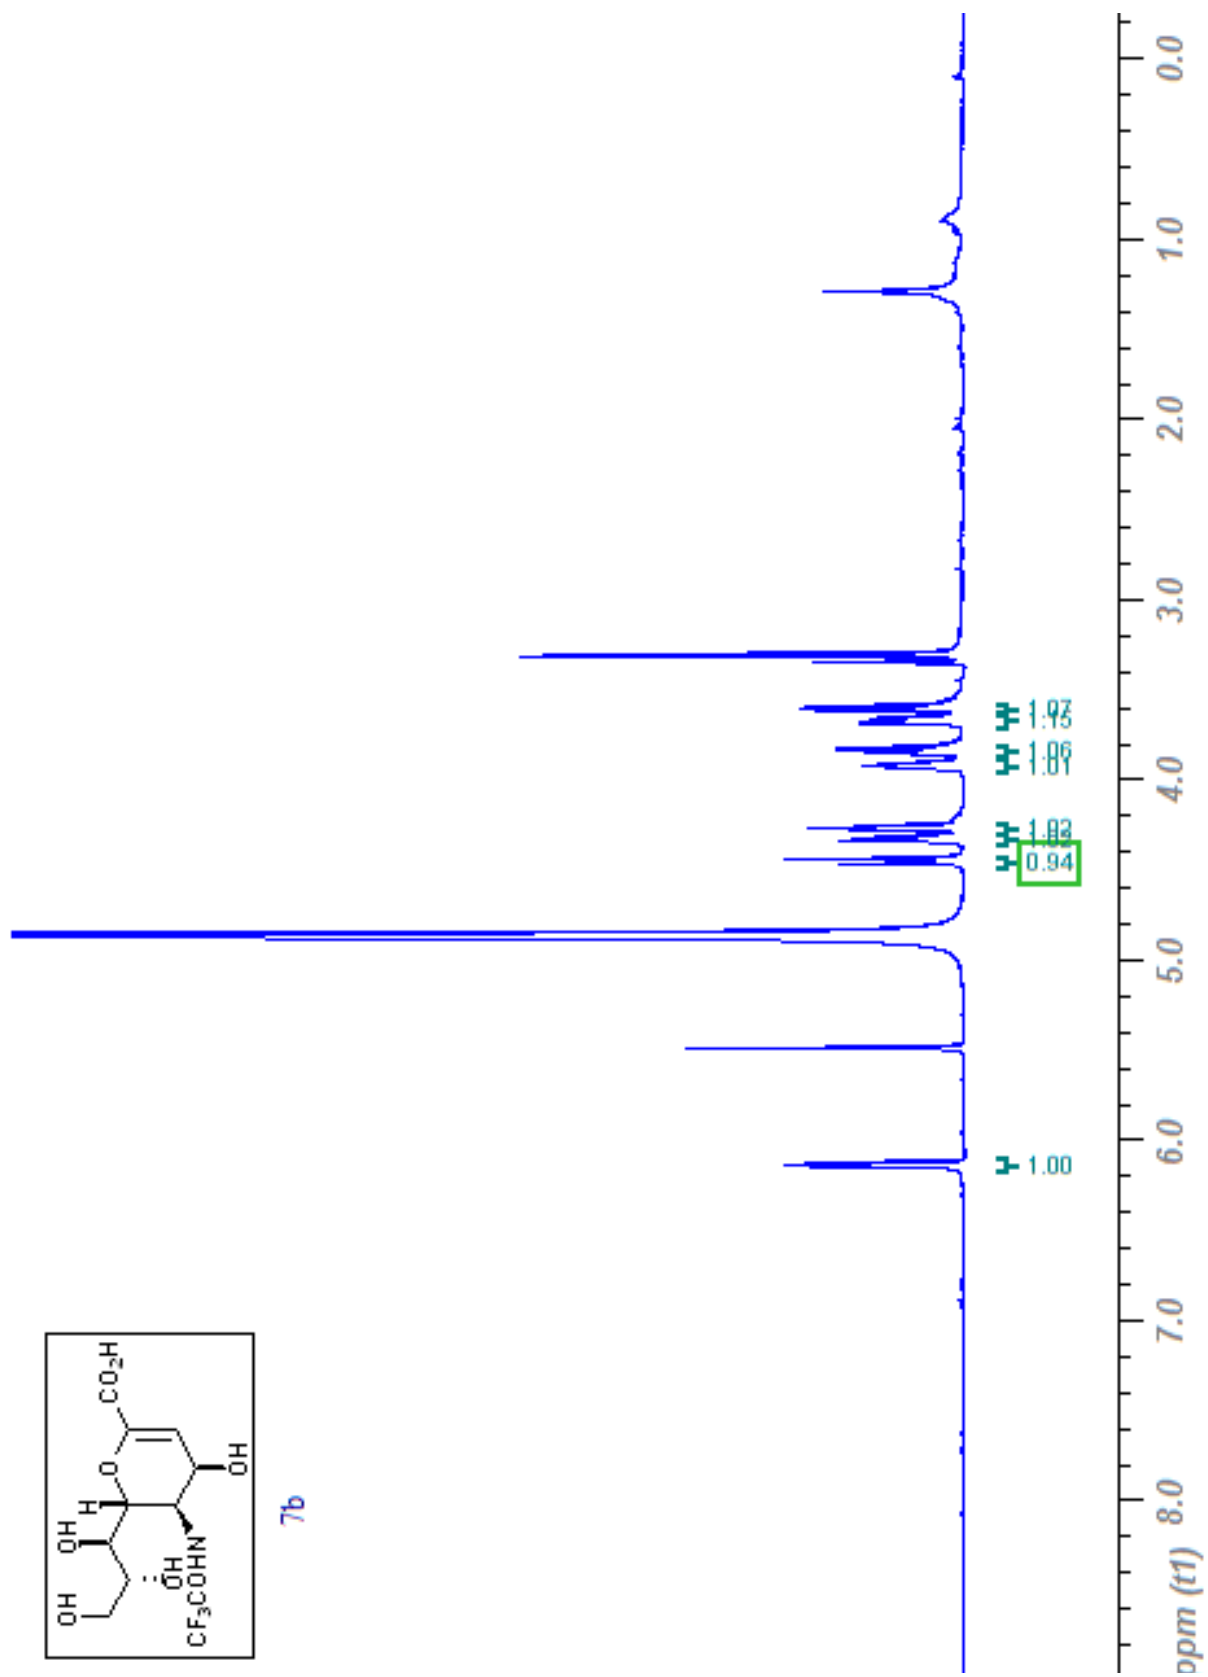



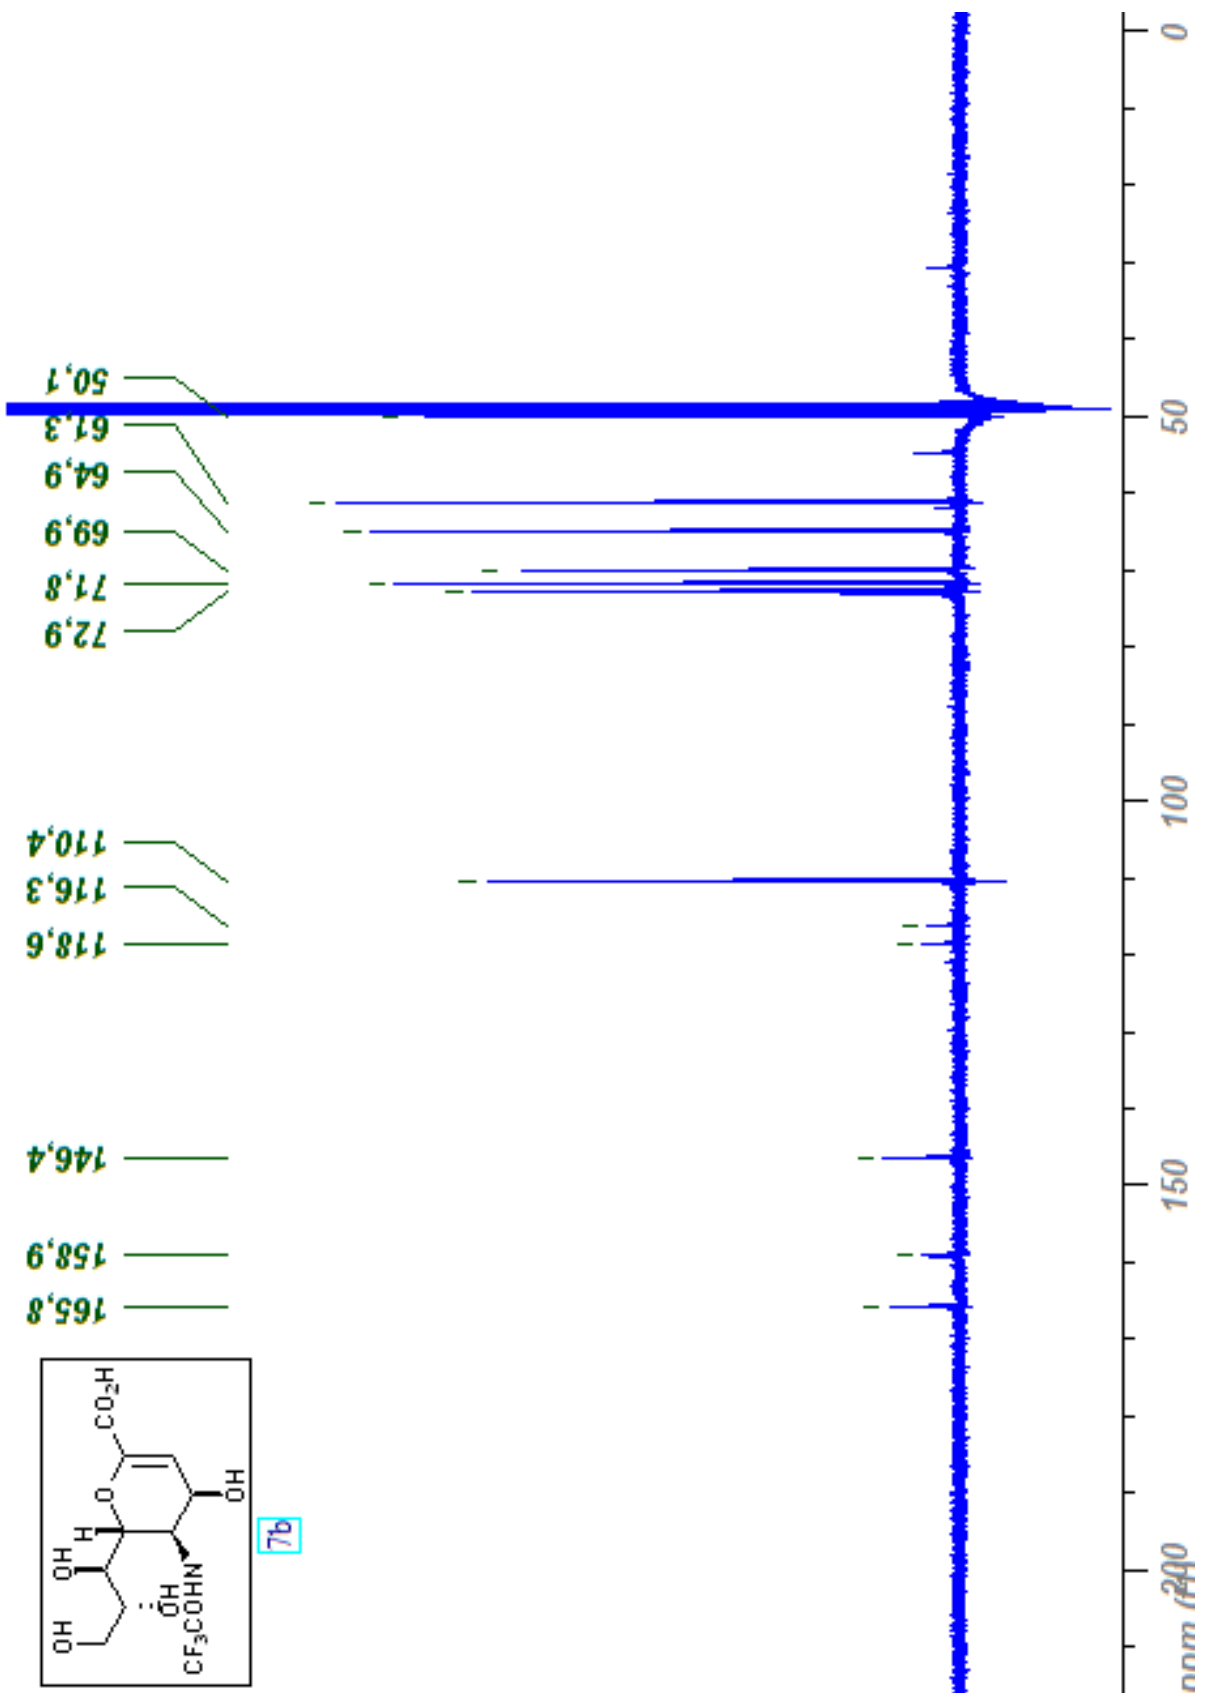

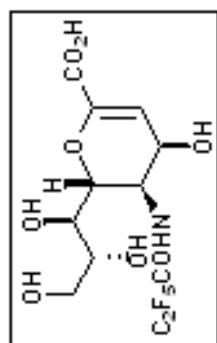

**7c**

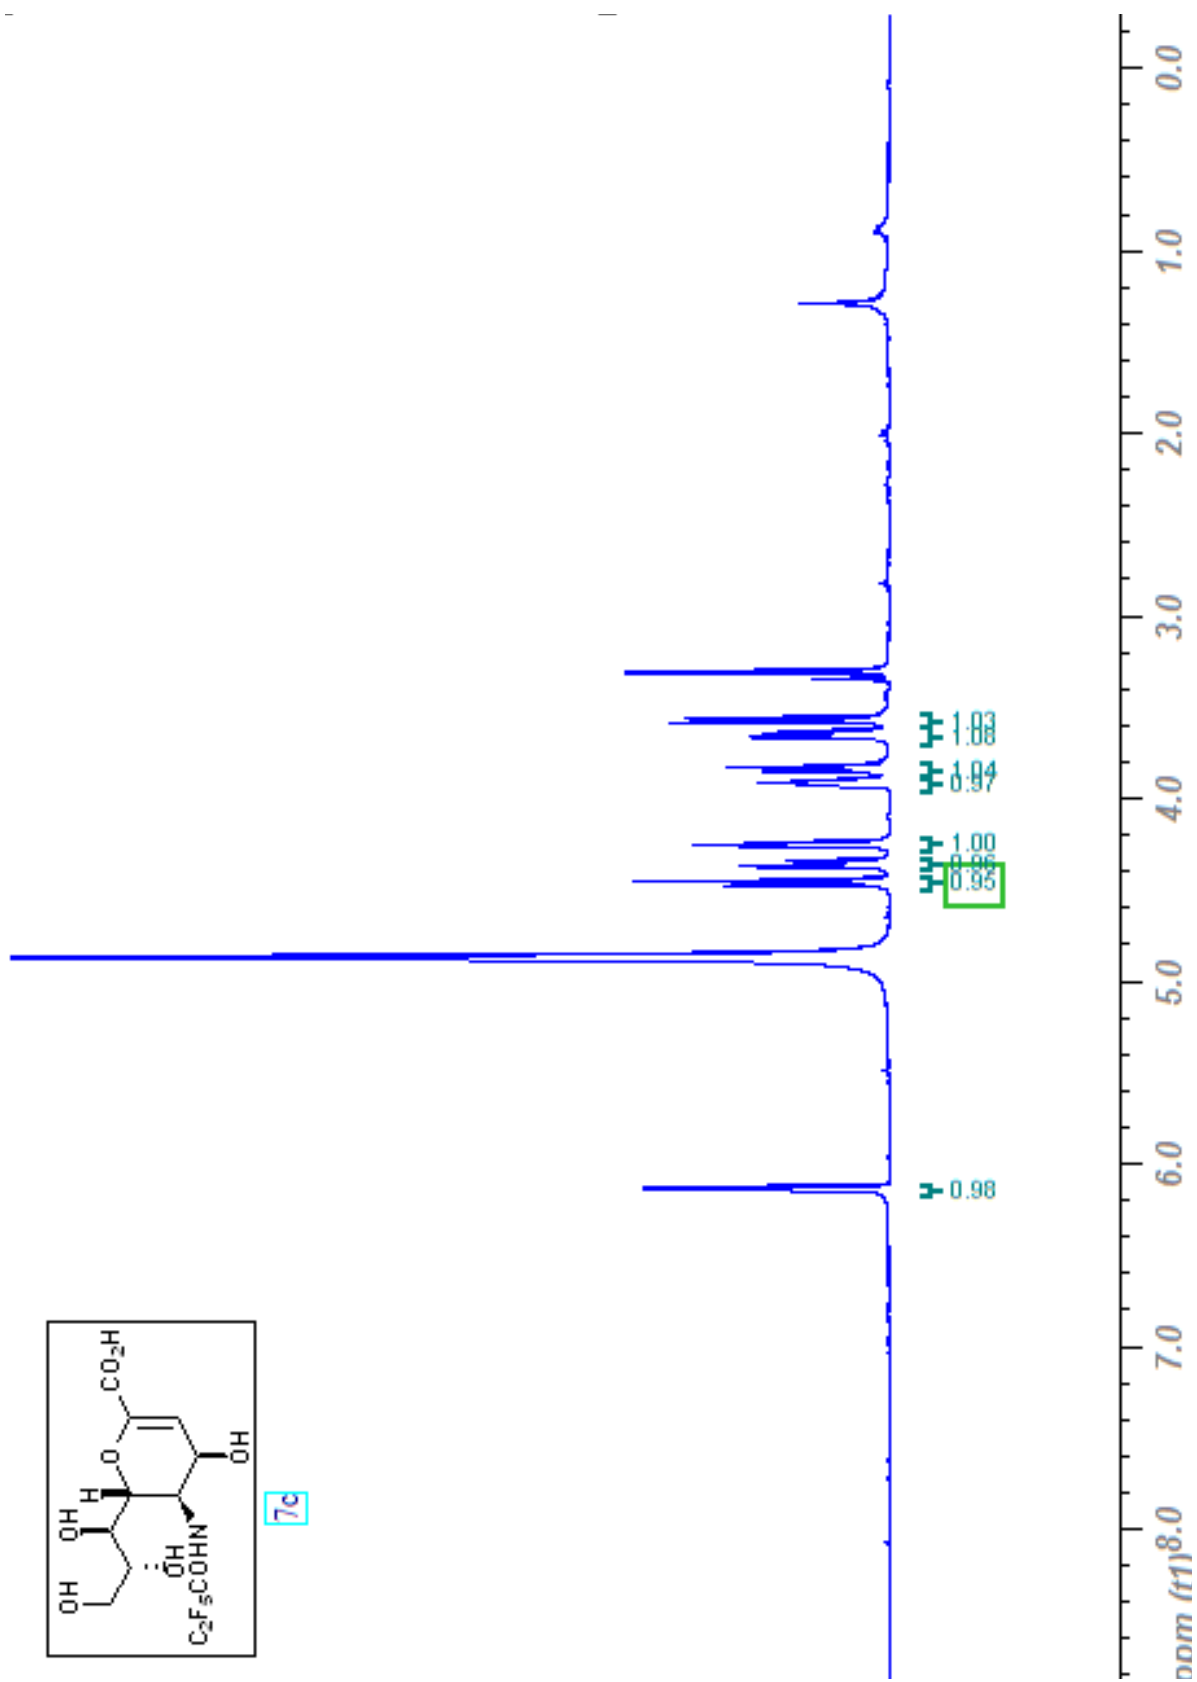

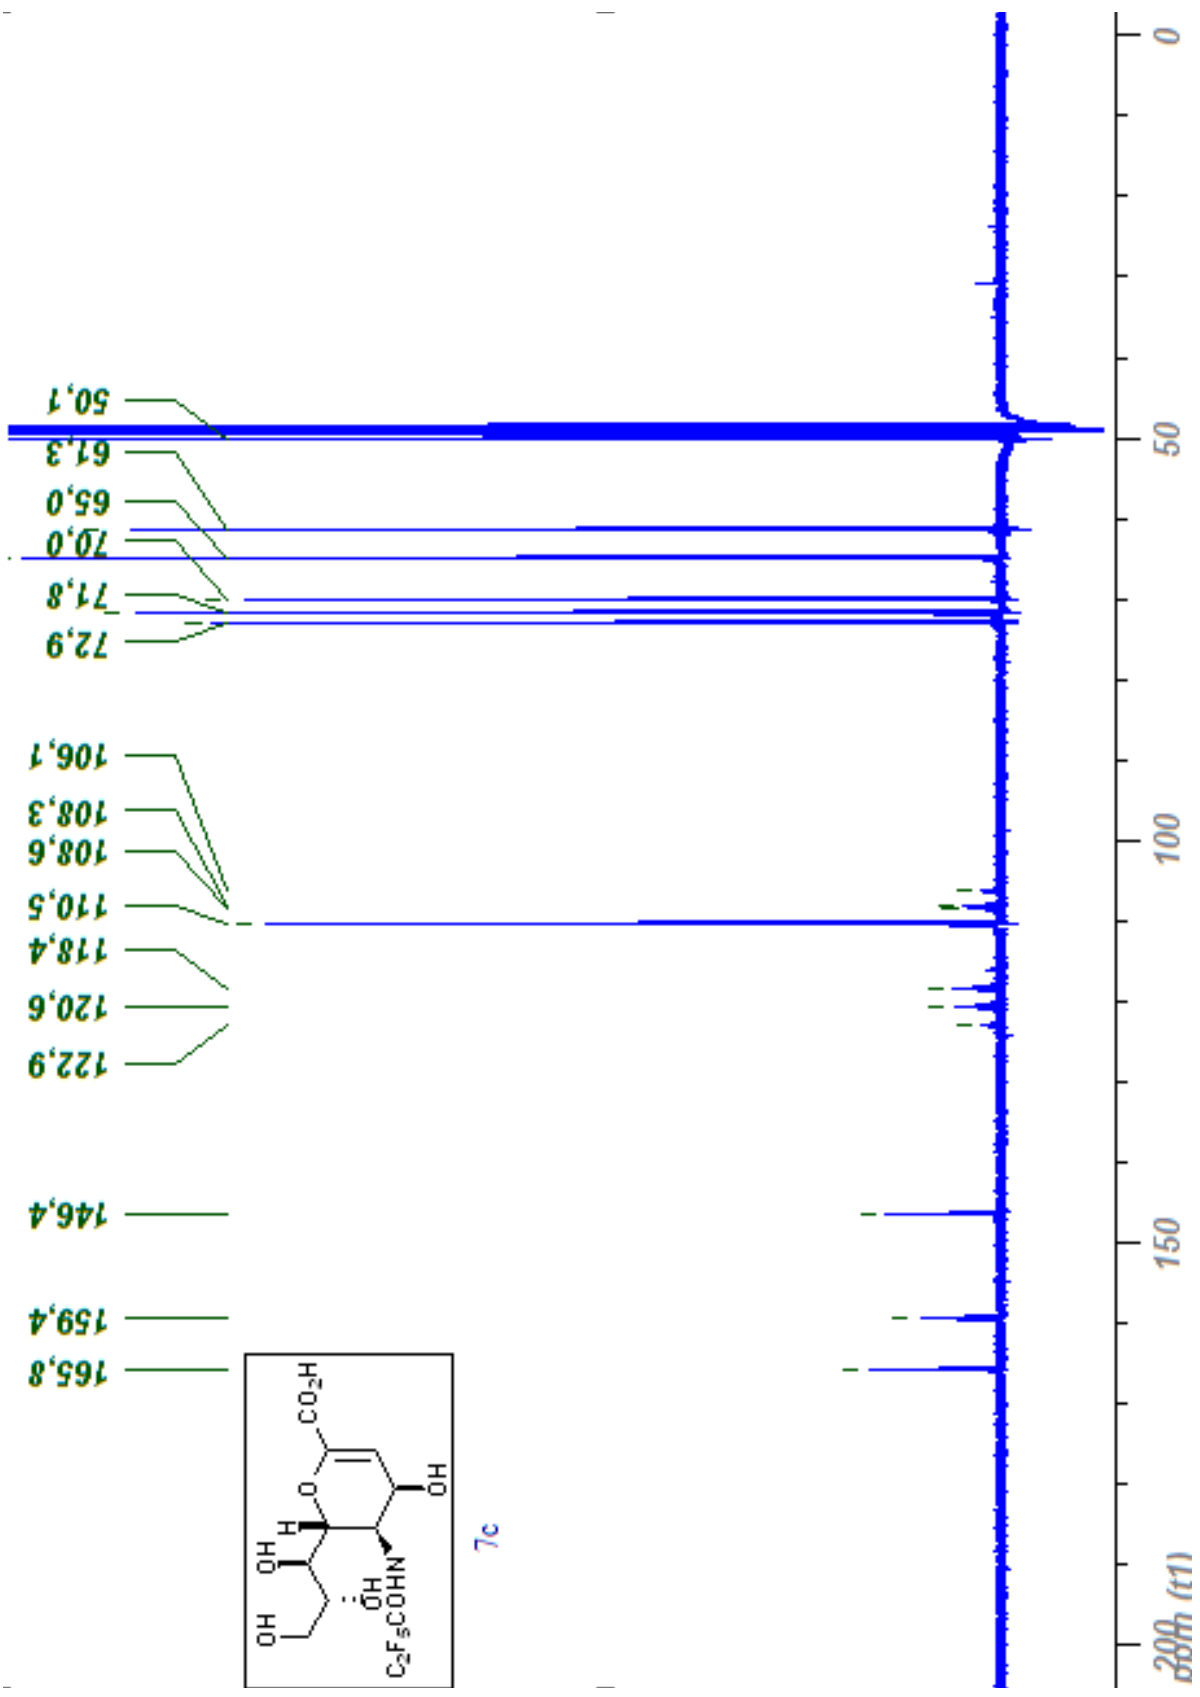

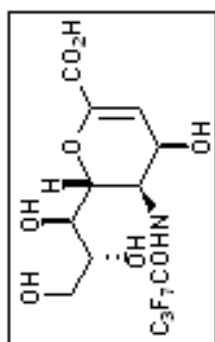

7d

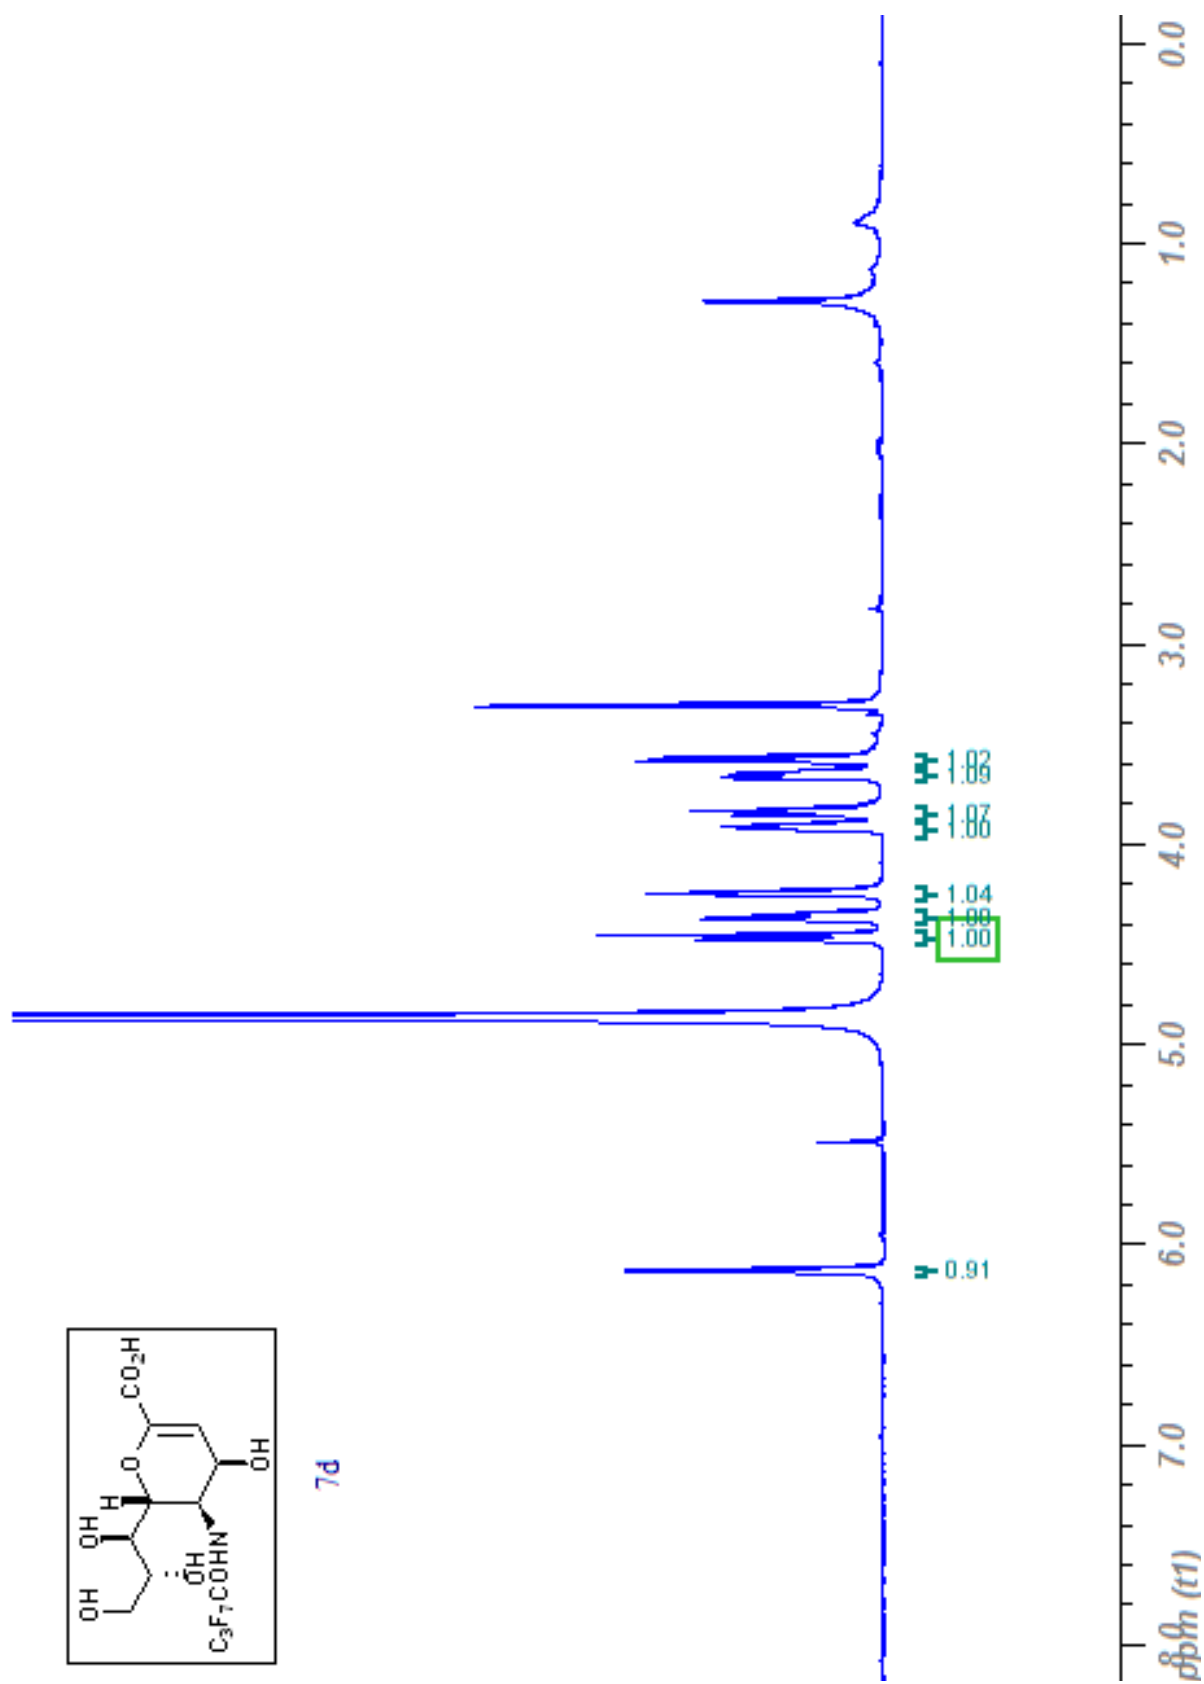

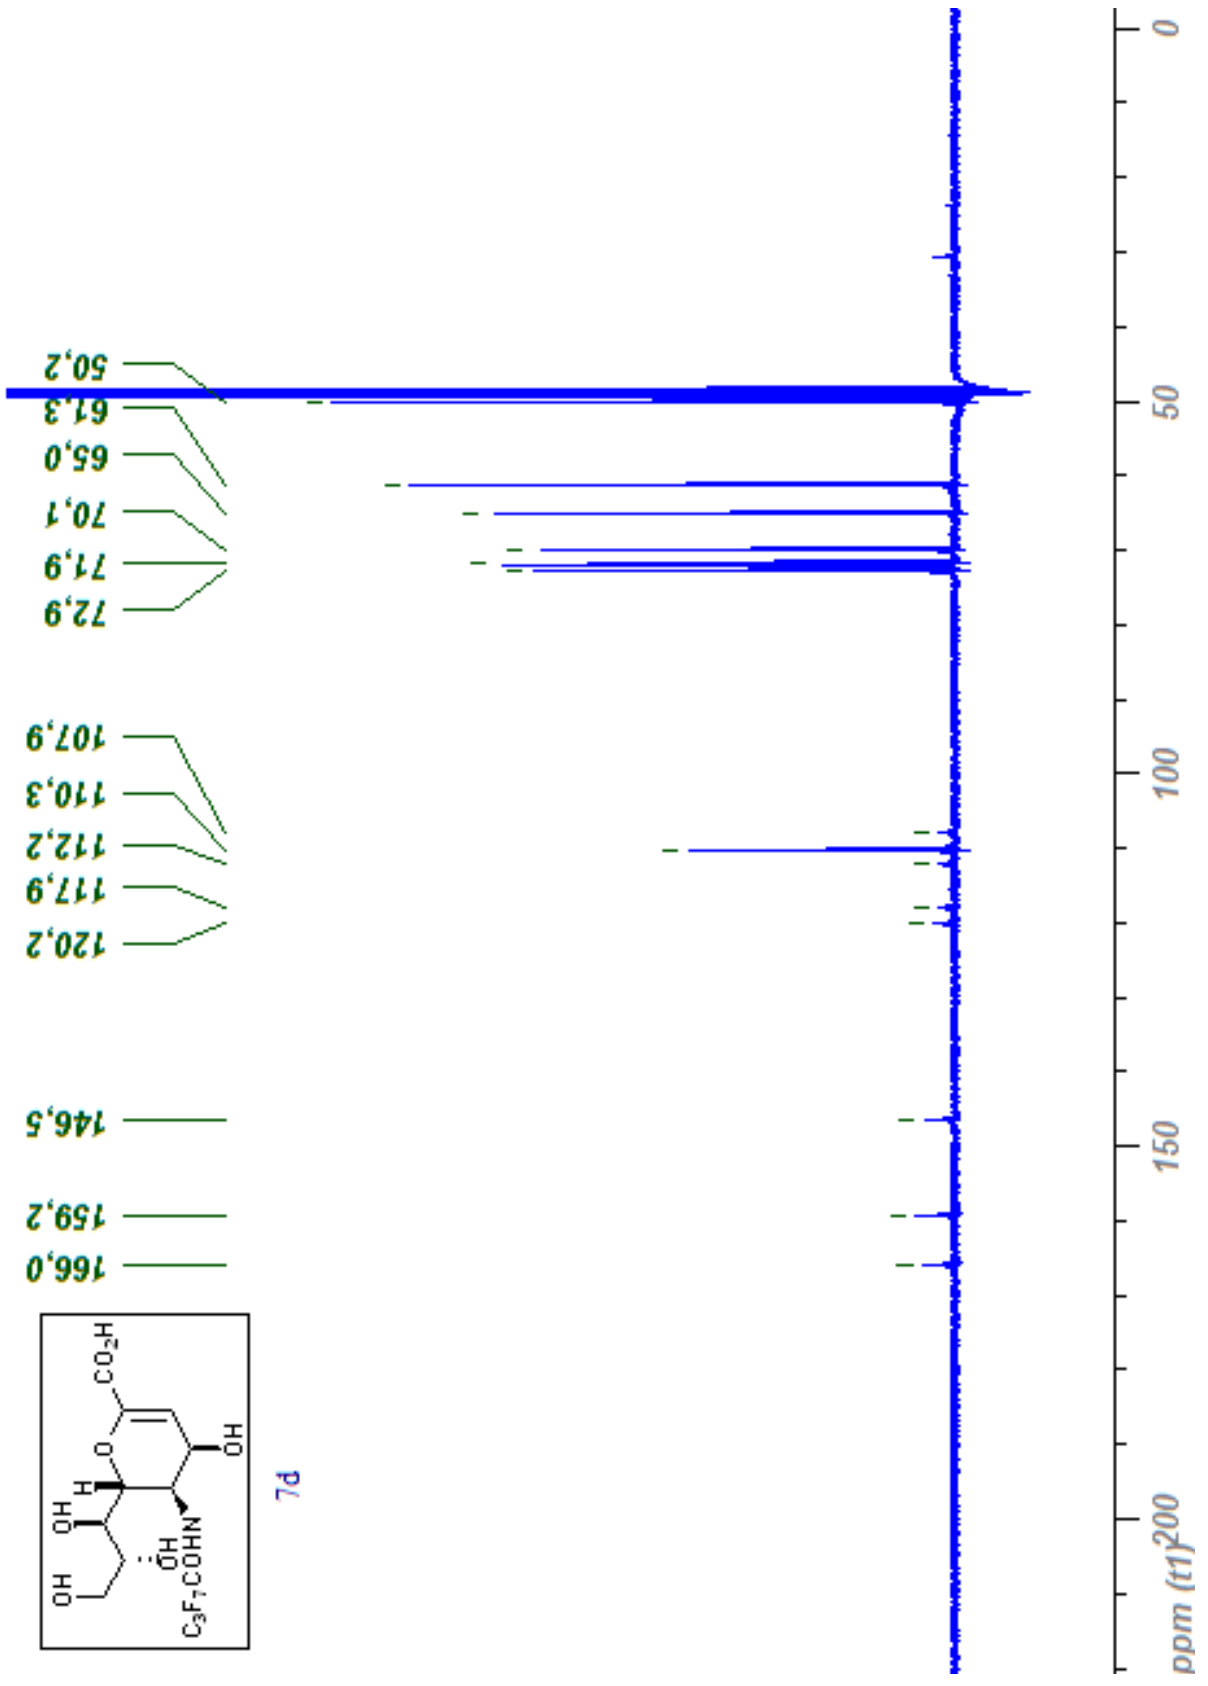

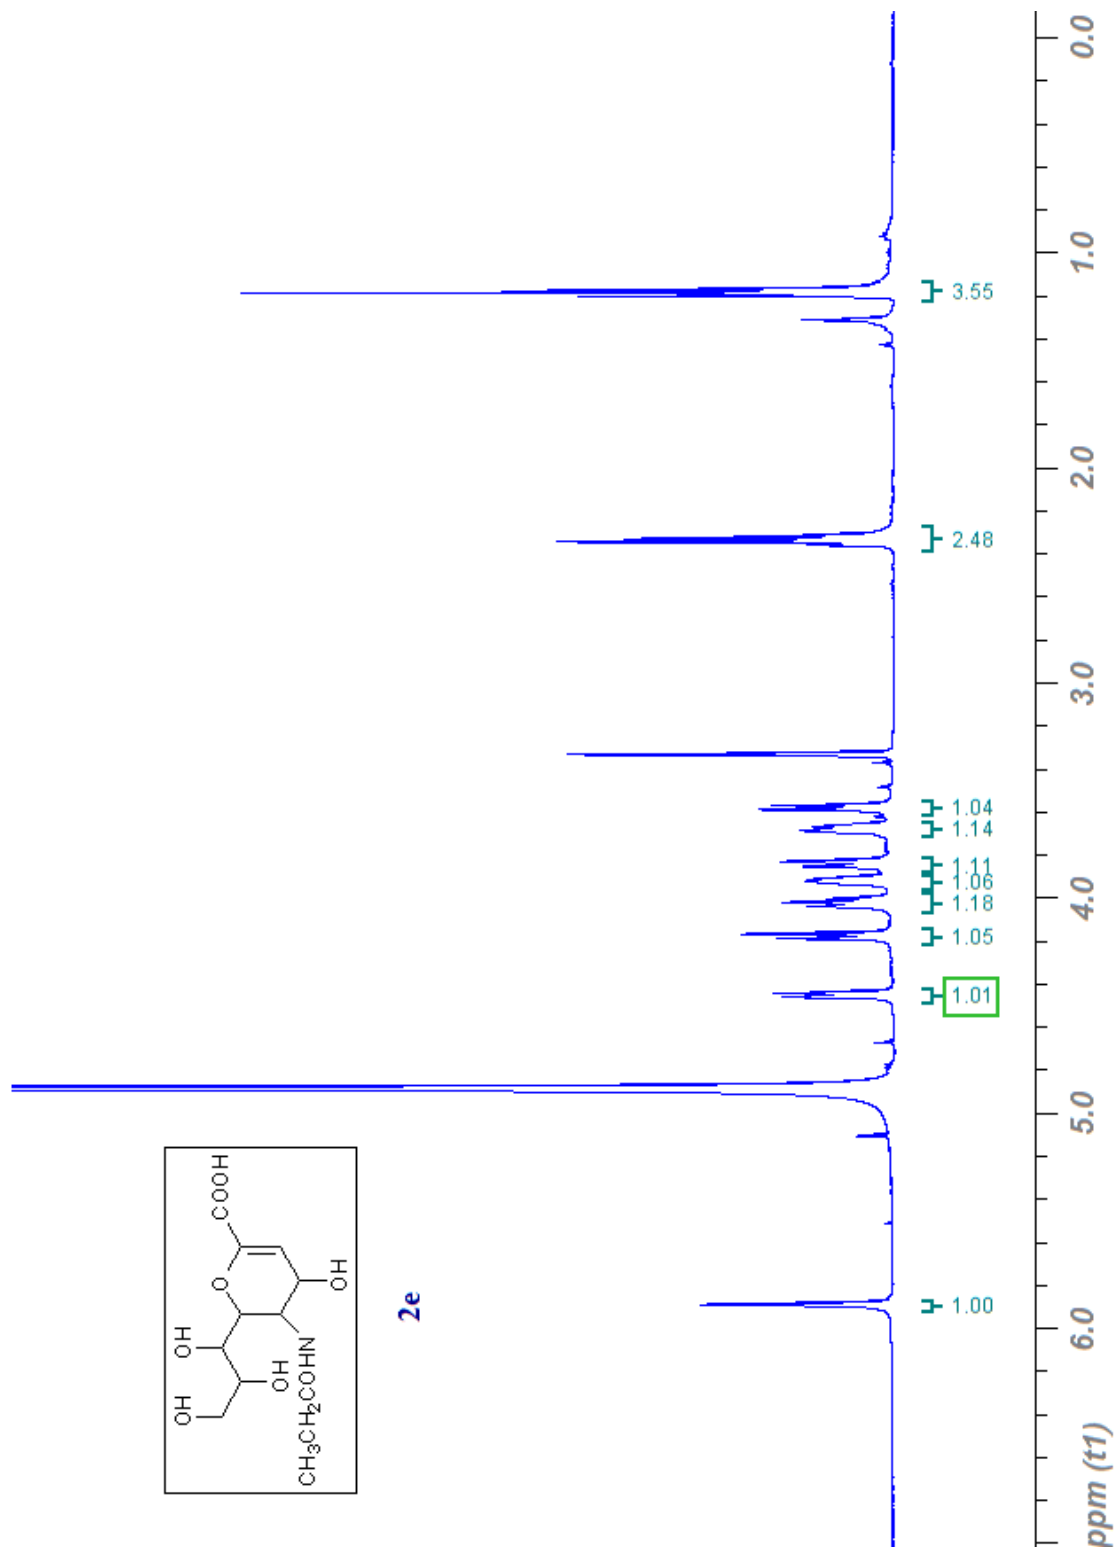

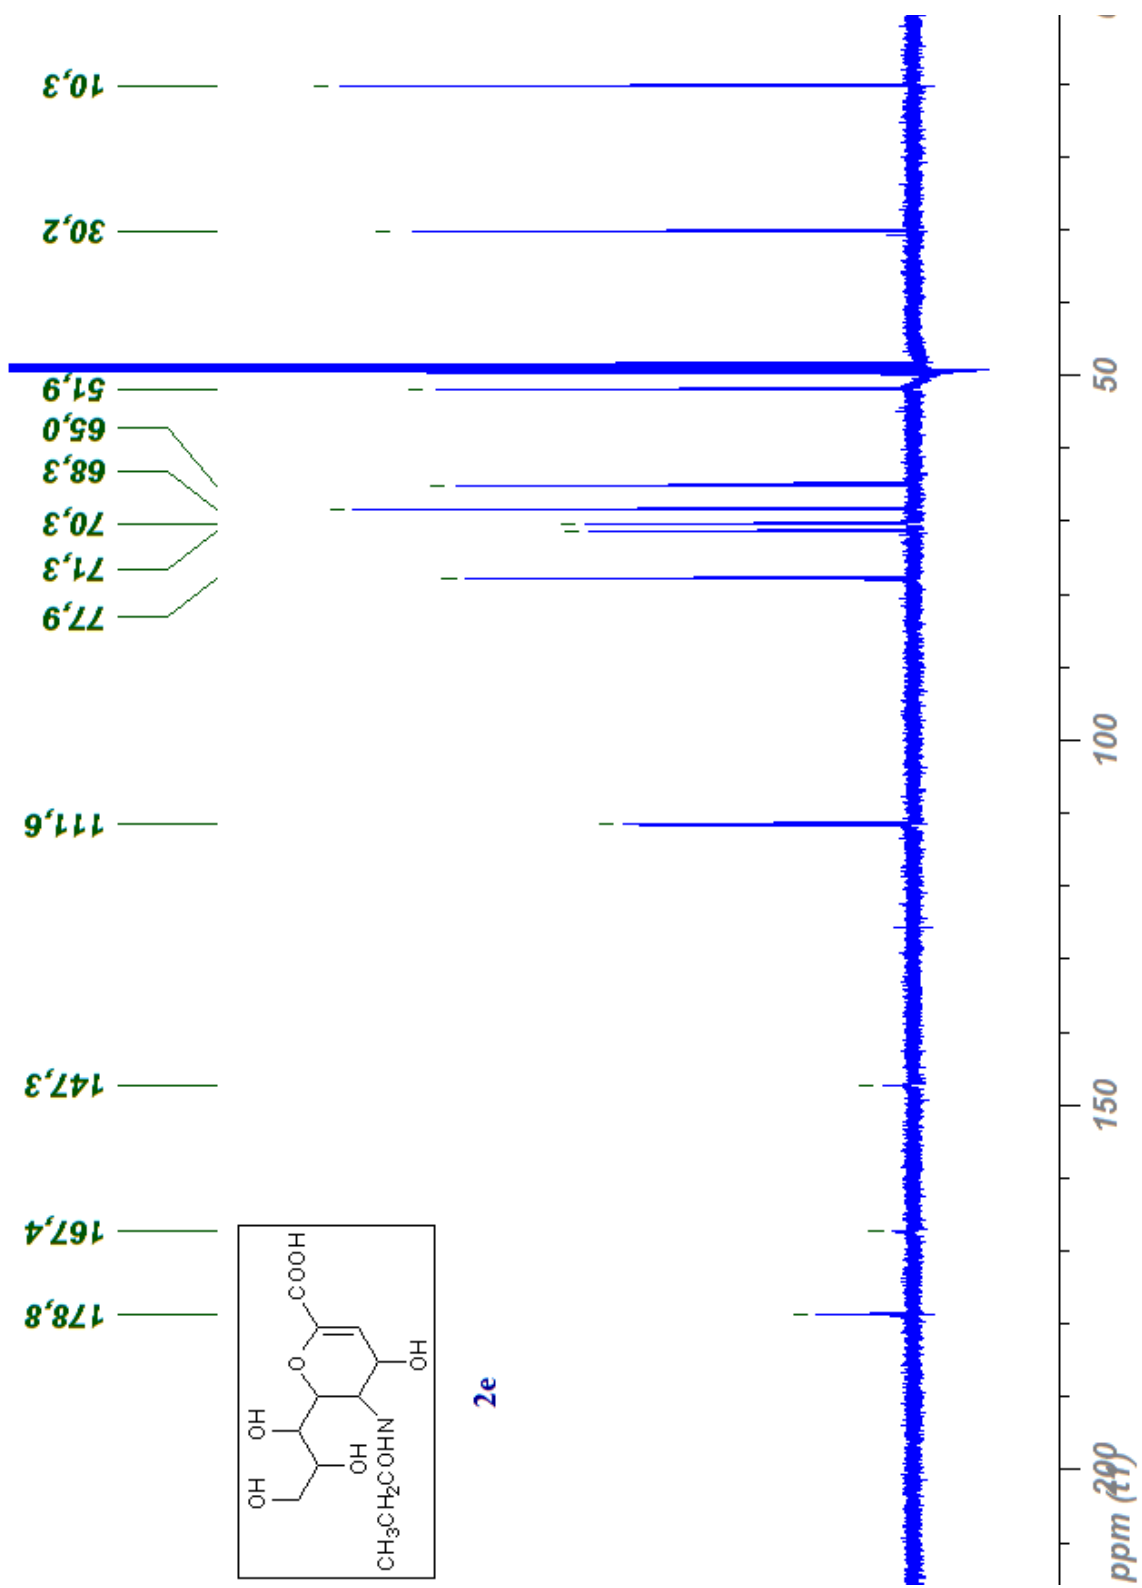

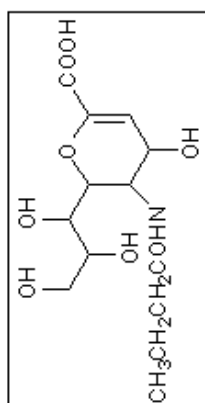

**2f**

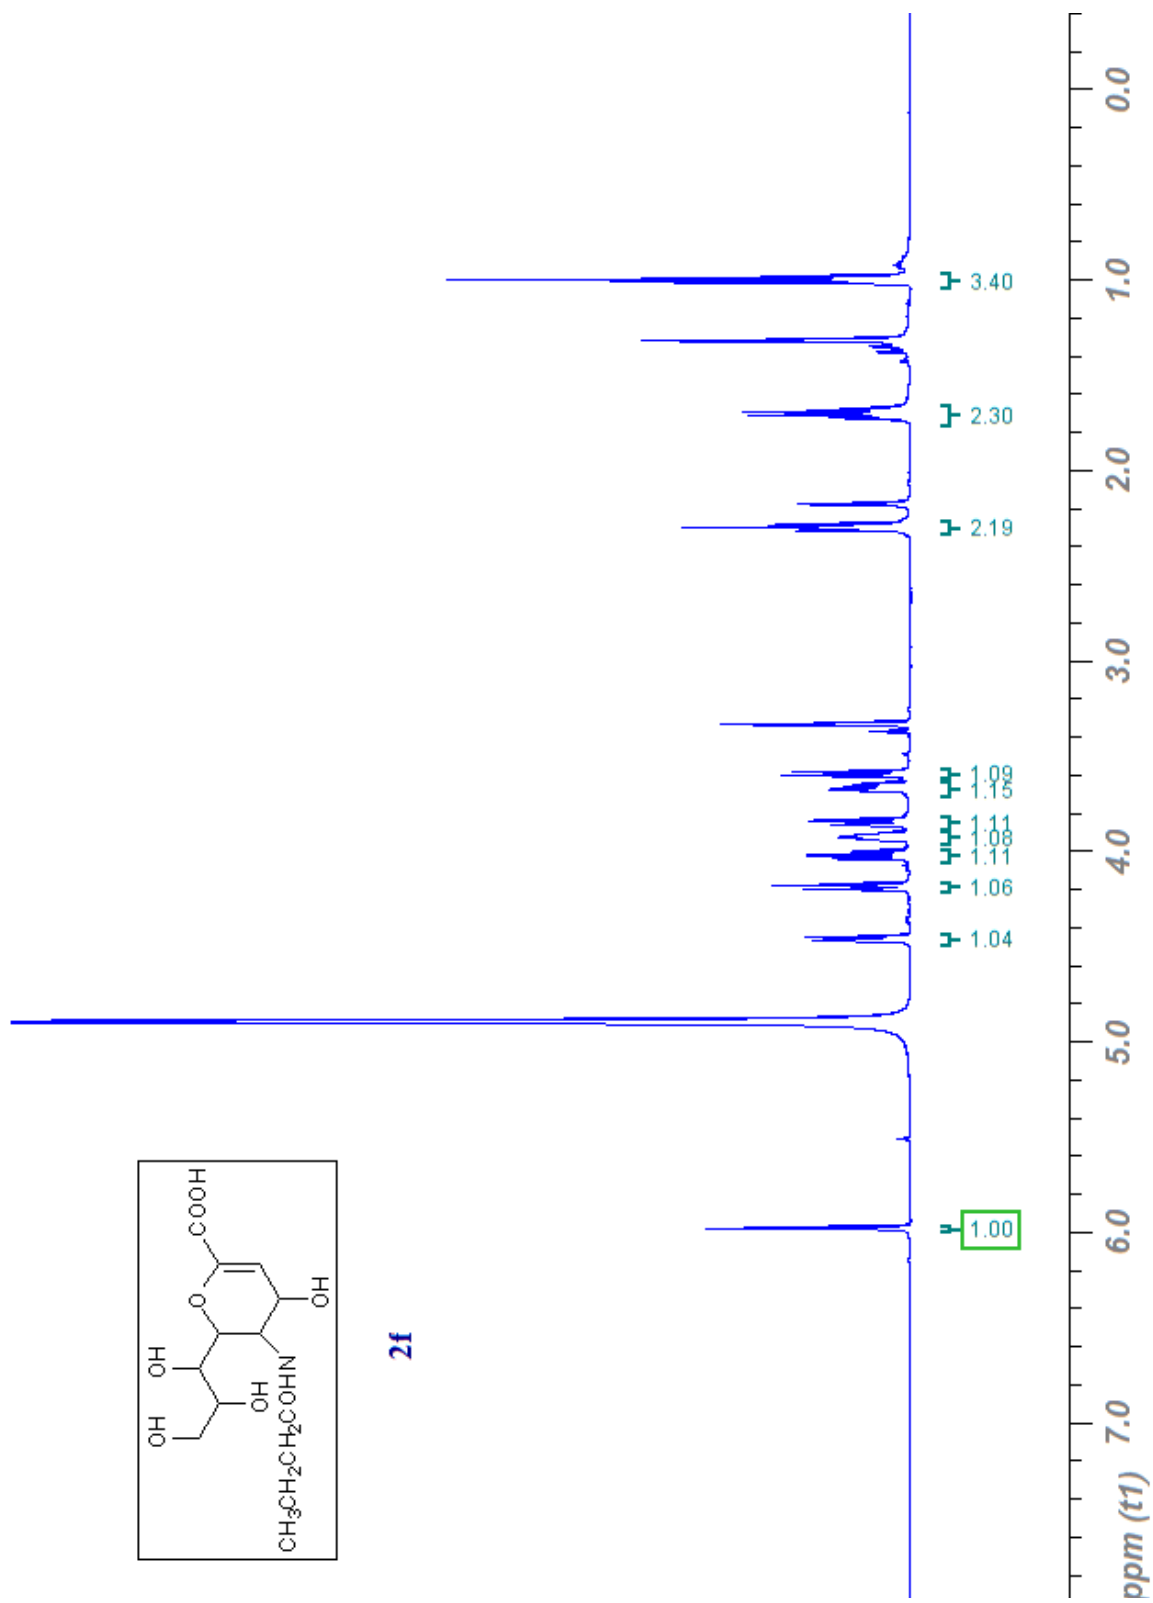



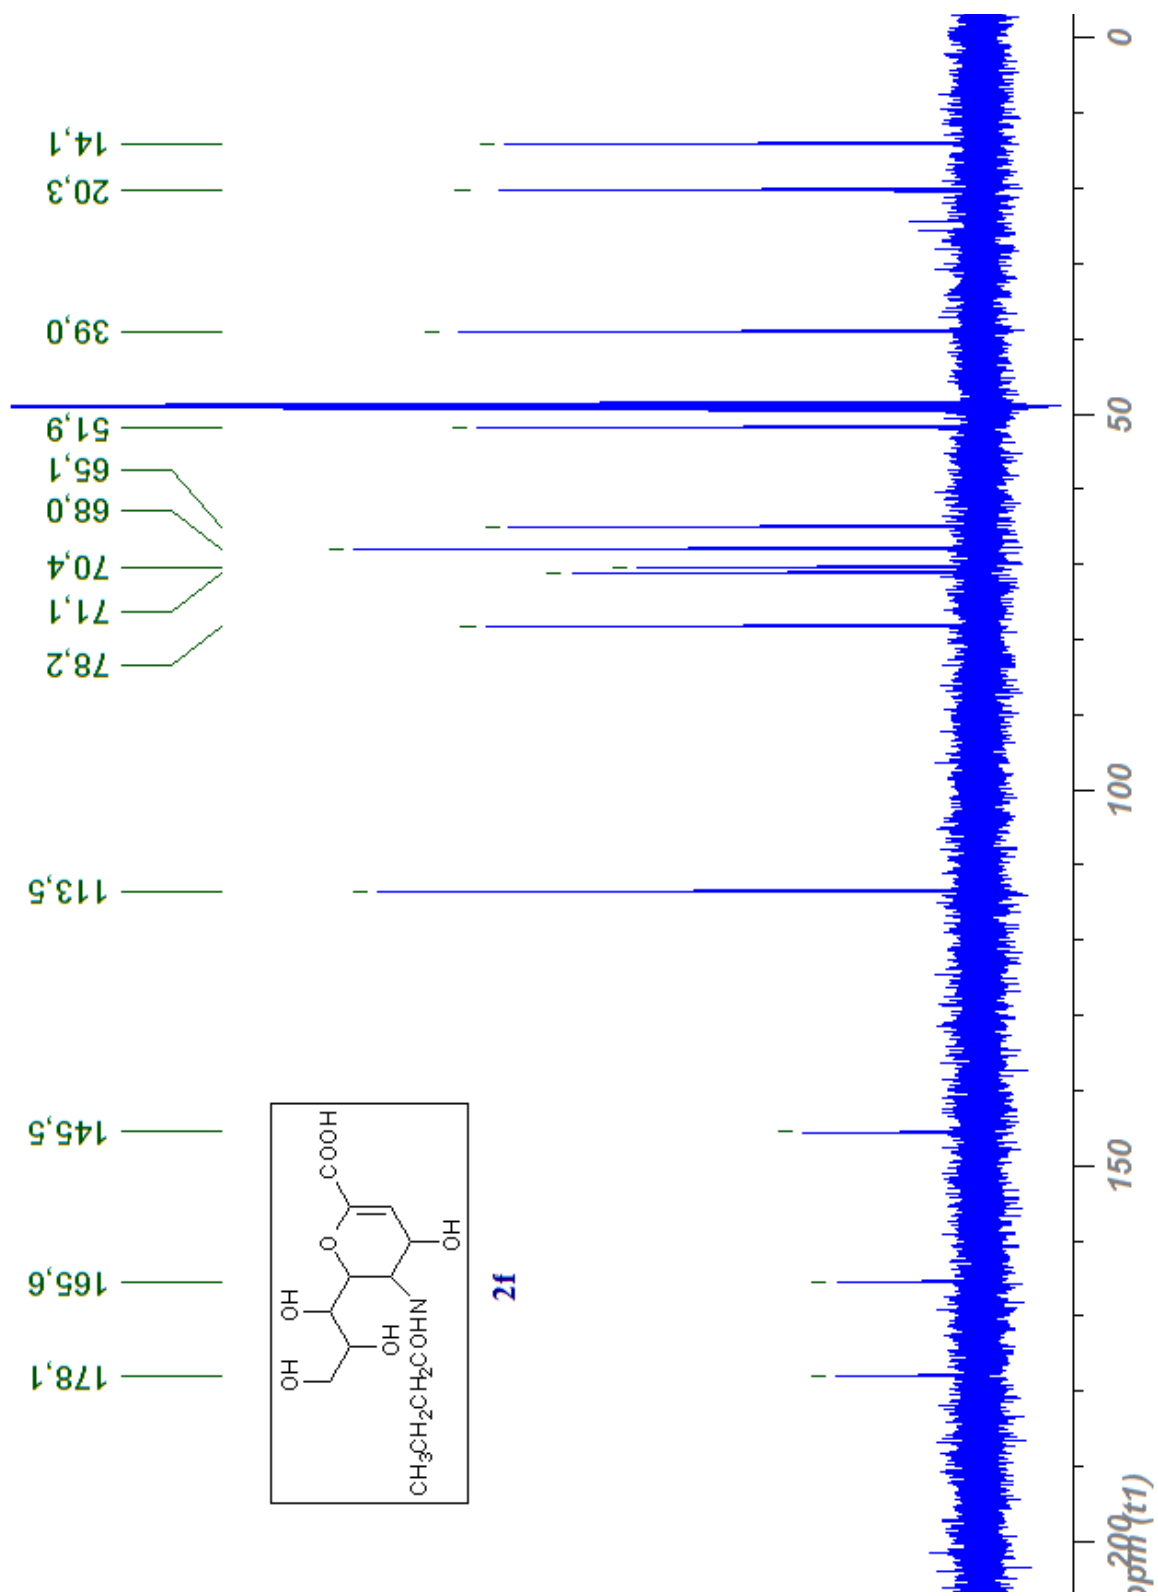

**Cytotoxicity assay:**

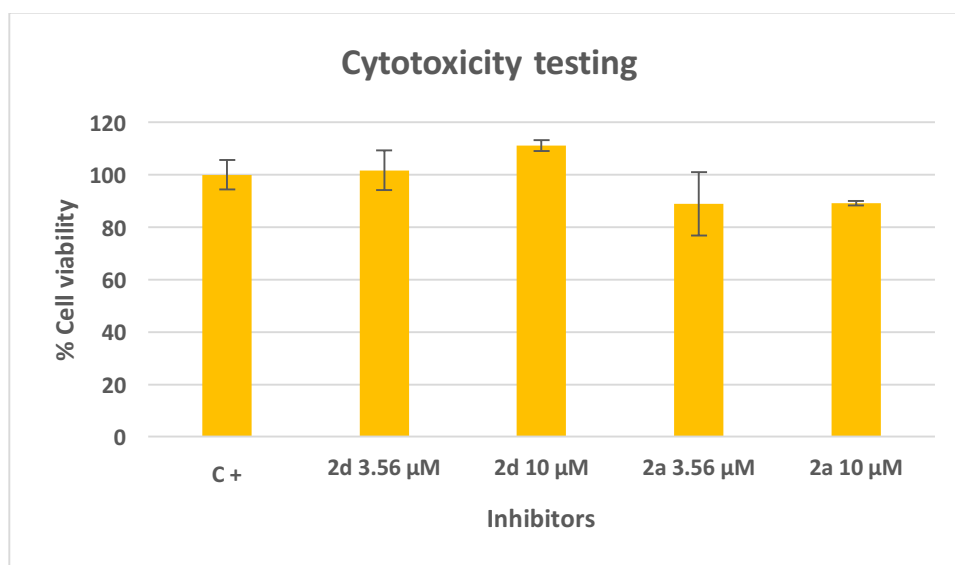

**Supplementary Figure 1.** COS7 cells viability in presence of 3.56 or 10 μM of compounds **2a** or **2d** for 24 hours. C+: positive control MTT.

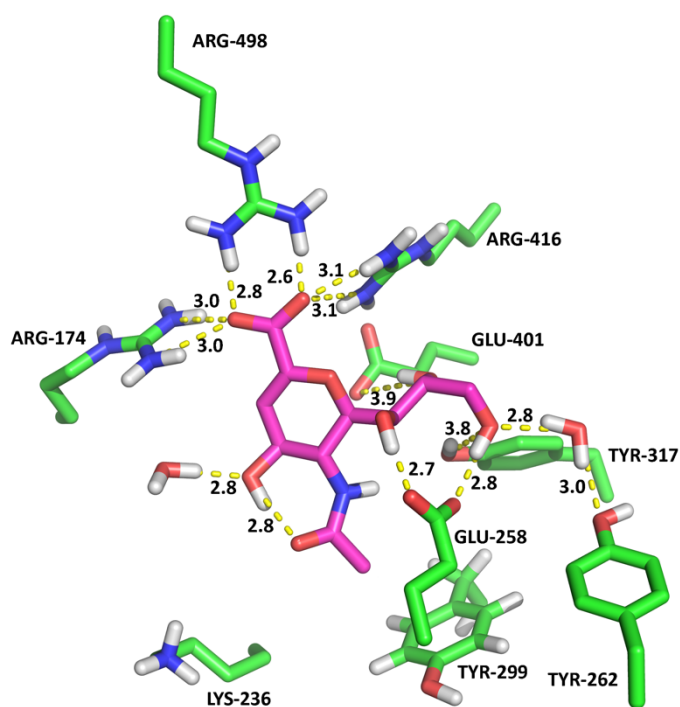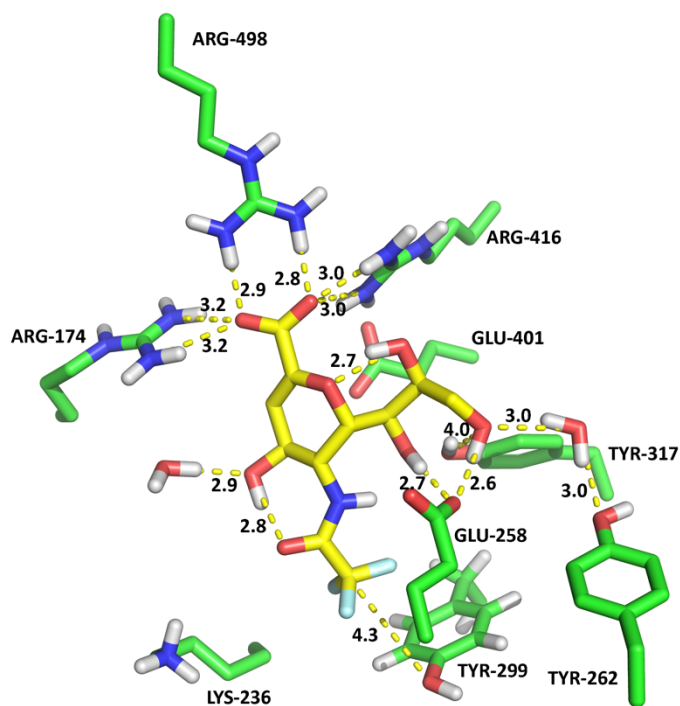

**Supplementary Figure 2.** Three-dimensional representation of the docking poses of the sialidase inhibitors DANA **2a** and FANA **2b**. The inhibitors are: magenta (**2a**) and yellow (**2b**). The interactions between the inhibitors and the enzyme are represented as yellow dashed lines, and the distances are measured in Å. Residue numeration is kept as in the PDB crystal (1E8V).

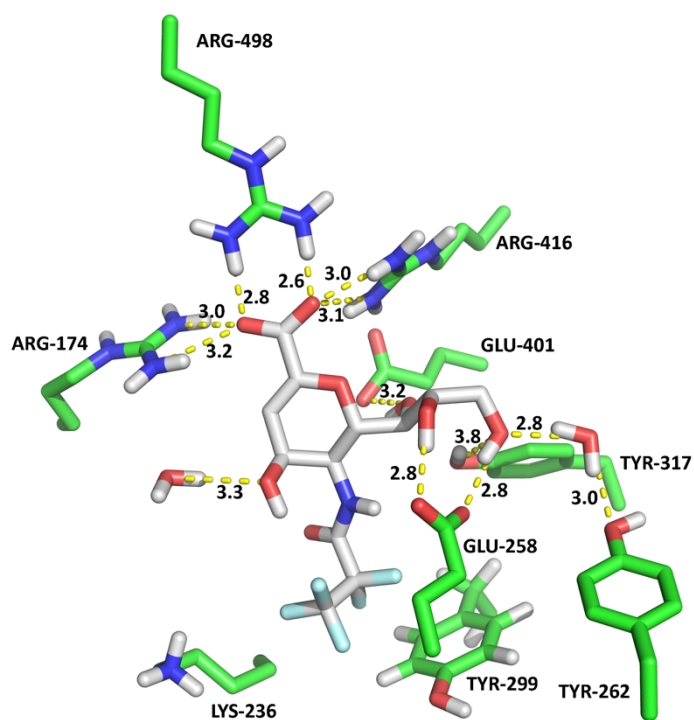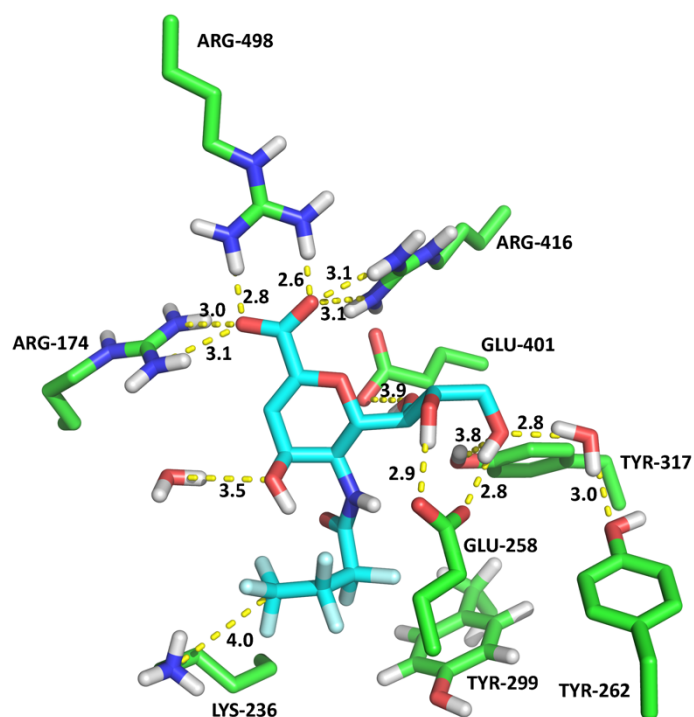

**Supplementary Figure 3.** Three-dimensional representation of the docking poses of the sialidase inhibitors **2c** and **2d**. The inhibitors are: gray (**2c**) and cyan (**2d**). The interactions between the inhibitors and the enzyme are represented as yellow dashed lines, and the distances are measured in Å. Residue numeration is kept as in the PDB crystal (1E8V).
